# Supplementary material for: HIV-1 Tat potently stabilises Mdm2 and enhances viral replication
Source: PubMed Central journal article supplement — Biochem J. 2017 Jul 11;474(14):2449–64. doi: 10.1042/BCJ20160825 (PMC5509382; doi:10.1042/bcj20160825), 2017-07-11
Supplement: BCJ-474-2449-s1.pdf [file BCJ-474-2449-s1.pdf]

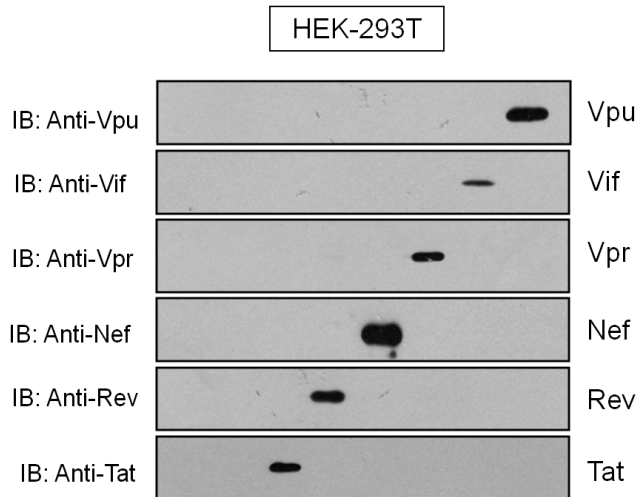

**Supplementary Figure 1** HEK-293T cells transfected with Myc-Mdm2 alone or with Myc-tagged viral genes as described earlier for Fig. 1c were also assessed with the antibodies specific for viral proteins to confirm their expression and band specificities. The bands of the viral proteins were obtained at their respective molecular sizes (Myc-Tat~17, Myc-Rev~19, Myc-Nef~27, Myc-Vpr~15, Myc-Vif~23 and Myc-Vpu~16; all in kDa).

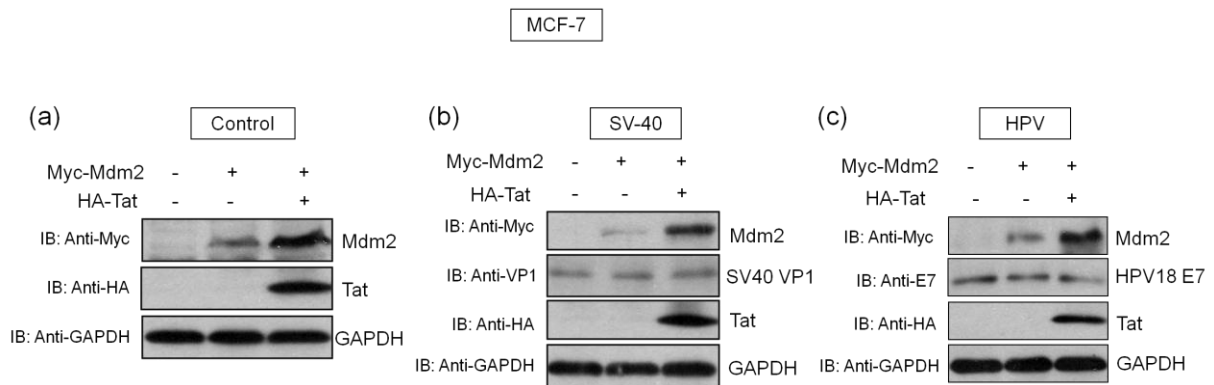

**Supplementary Figure 2 (a)** MCF-7 cells were transfected with p-CMV-Myc3-Mdm2 (2 $\mu$ g) and HA-Tat (1 $\mu$ g). The cells were harvested after 36 hrs and subjected to western analysis using anti-Myc antibody. **(b)** MCF-7 cells were transfected with p-CMV-Myc3-Mdm2 (2 $\mu$ g) and SV-40 plasmid in the presence or absence of HA-Tat (1 $\mu$ g). The cells were harvested after 36 hrs and subjected to western analysis using anti-Myc antibody. GAPDH was used as a loading control. **(c)** MCF-7 cells were transfected with p-CMV-Myc3-Mdm2 (2 $\mu$ g) and HPV-18 vector in the presence or absence of HA-Tat (1 $\mu$ g). The cells were harvested after 36 hrs and subjected to western analysis using anti-Myc antibody.

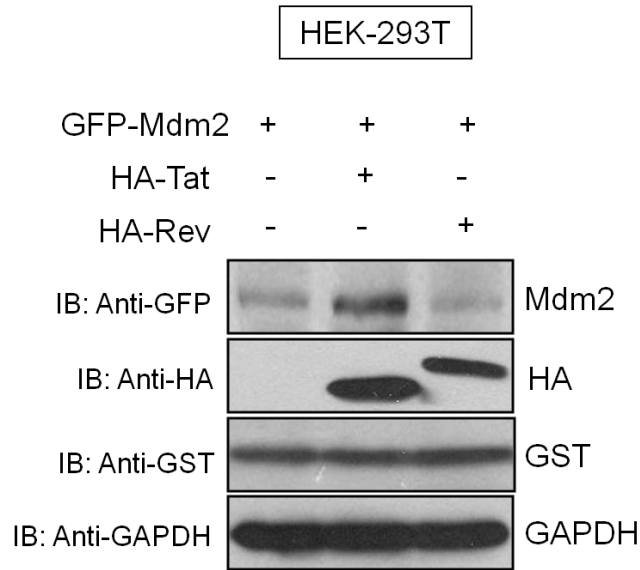

**Supplementary Figure 3** HEK-293T cells were transfected with pEGFP-Mdm2 (3 $\mu$ g) either alone or with HA-Tat or HA-Rev (1 $\mu$ g each). The cells were also transfected with a GST-expressing plasmid pEBG (100ng per well) to normalise transfection efficiency. Cell lysates were prepared 36 hrs post-transfection and western analysis was performed to probe GFP-Mdm2 levels. GAPDH was used as a loading control.

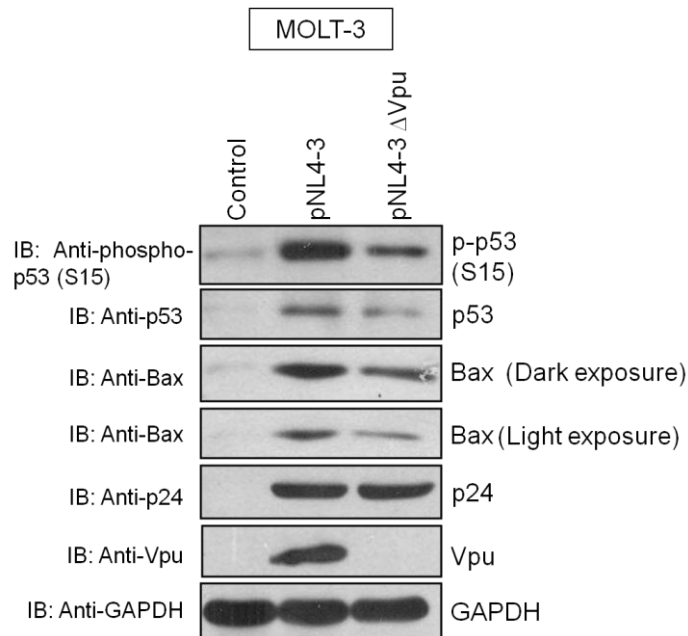

**Supplementary Figure 4** MOLT-3 cells were infected with wild-type (pNL4-3) and  $\Delta$ Vpu (pNL4-3 $\Delta$ Vpu) VSVG-pseudotyped HIV-1 at an MOI of 1 for 48 hrs. The cells were collected and subjected to western analysis with anti-p53, anti-phospho-p53 (S15), anti-p24, anti-Vpu and anti-Bax antibodies. GAPDH was used as a loading control.

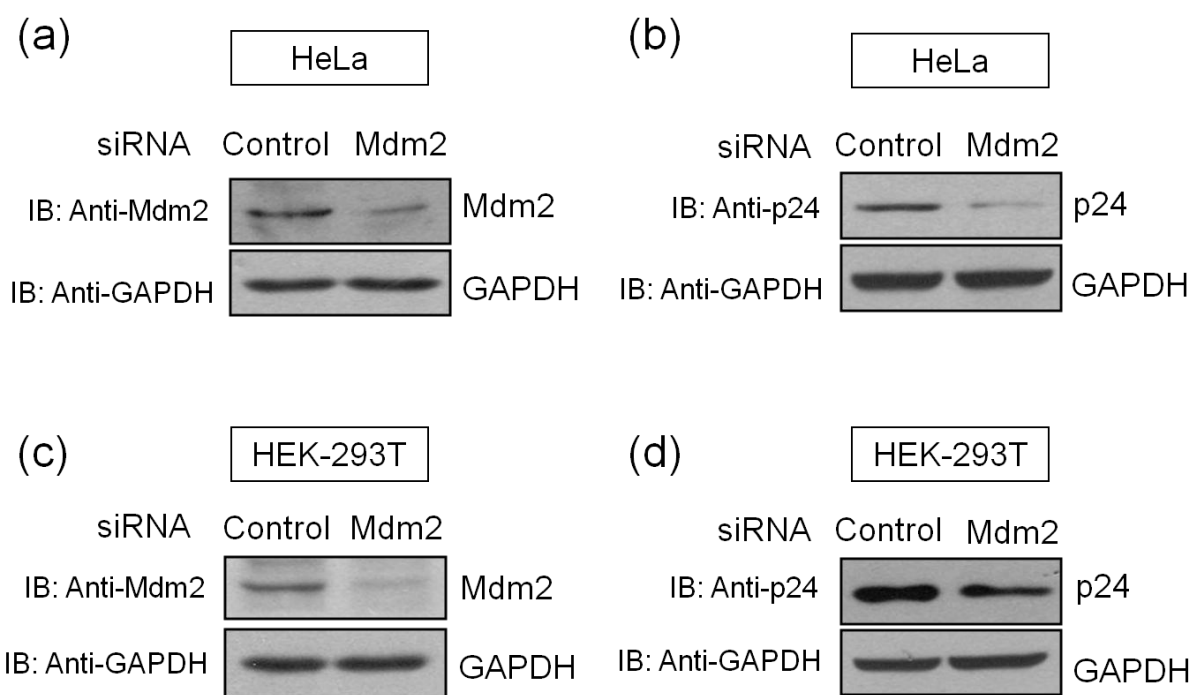

**Supplementary Figure 5 (a, b)** HeLa cells were transfected with siRNA specific for Mdm2 and a control siRNA, and the levels of Mdm2 and GAPDH were determined by western analysis. siRNA-treated HeLa cells were transfected with pNL4-3 proviral DNA for 24 hrs. The cells were harvested after 24 hrs and the levels of p24 were determined. GAPDH was used as a loading control. **(c, d)** HEK-293T cells were transfected with siRNA specific for Mdm2 and a control siRNA, and the levels of Mdm2 and GAPDH were determined by western analysis. siRNA-treated HEK-293T cells were transfected with pNL4-3 proviral DNA for 24 hrs. The cells were harvested after 24 hrs and the levels of p24 were determined. GAPDH was used as a loading control. The results are representative of two independent experiments
